# Supplementary material for: Complete Genome Characterization of a Novel Enterovirus Type EV-B106 Isolated in China, 2012
Source: PubMed Central journal article supplement — Sci Rep. 2014 Mar 3;4:4255. doi: 10.1038/srep04255 (PMC3939458; doi:10.1038/srep04255), 2014-03-03
Supplement: srep04255-s1.pdf [file srep04255-s1.pdf]

# **Complete Genome Characterization of a Novel Enterovirus Type**

## **EV-B106 Isolated in China, 2012**

Jingjing Tang , Zexin Tao , Zhengrong Ding , Yong Zhang, Jie Zhang , Bingjun Tian ,  
Zhixian Zhao , Lifen Zhang , Wenbo Xu

**Supplementary Table S1. Human enterovirus prototype strains used in this study.**

| Species | Type | Accession number | Stain          |
|---------|------|------------------|----------------|
| EV-A    | CA2  | AY421760         | Fleetwood      |
| EV-A    | CA3  | AY421761         | Olson          |
| EV-A    | CA4  | AY421762         | High Point     |
| EV-A    | CA5  | AY421763         | Swartz         |
| EV-A    | CA6  | AY421764         | Gdula          |
| EV-A    | CA7  | AY421765         | Parker         |
| EV-A    | CA8  | AY421766         | Donovan        |
| EV-A    | CA10 | AY421767         | Kowalik        |
| EV-A    | CA12 | AY421768         | Texas-12       |
| EV-A    | CA14 | AY421769         | strain G-14    |
| EV-A    | CA16 | U05876           | A16 G-10       |
| EV-A    | EV71 | U22521           | BrCr           |
| EV-A    | EV76 | AY697458         | FRA91-10369    |
| EV-A    | EV89 | AY697459         | BAN00-10359    |
| EV-A    | EV90 | AY697460         | BAN99-10399    |
| EV-A    | EV91 | AY697461         | BAN00-10406    |
| EV-A    | EV92 | EF667344         | USA/GA99-RJg-7 |
| EV-B    | CB1  | M16560           | Conn-5         |
| EV-B    | CB2  | AF085363         | Ohio-1         |
| EV-B    | CB3  | M16572           | Nancy          |
| EV-B    | CB4  | X05690           | JVB            |
| EV-B    | CB5  | X67706           | 1954-85-UK     |
| EV-B    | CB6  | AF039205         | Schmitt        |
| EV-B    | E1   | AF029859         | Farouk         |
| EV-B    | E2   | AF465518         | Comelis        |

---

| Species | Type | Accession number | Stain      |
|---------|------|------------------|------------|
| EV-B    | E3   | AY302553         | Morrisey   |
| EV-B    | E4   | AY302557         | Pesacek    |
| EV-B    | E5   | AF083069         | Noyce      |
| EV-B    | E6   | U16283           | lytic      |
| EV-B    | E7   | AF465516         | Wallace    |
| EV-B    | E9   | X84981           | Hill       |
| EV-B    | E11  | X80059           | Gregory    |
| EV-B    | E12  | X79047           | Travis     |
| EV-B    | E13  | AY302539         | Del Carmen |
| EV-B    | E14  | AY302540         | Tow        |
| EV-B    | E15  | AY302541         | CH96-51    |
| EV-B    | E16  | AY302542         | Harrington |
| EV-B    | E17  | AY302543         | CHHE-29    |
| EV-B    | E18  | AF317694         | Metcalf    |
| EV-B    | E19  | AY167107         | K-542-81   |
| EV-B    | E20  | AY302546         | JV-1       |
| EV-B    | E21  | AY302547         | Farina     |
| EV-B    | E24  | AY302548         | DeCamp     |
| EV-B    | E25  | AY302549         | JV-4       |
| EV-B    | E26  | AY302550         | Coronel    |
| EV-B    | E27  | AY302551         | Bacon      |
| EV-B    | E29  | AY302552         | JV-10      |
| EV-B    | E30  | AF162711         | Bastianni  |
| EV-B    | E31  | AY302554         | Caldwell   |
| EV-B    | E32  | AY302555         | PR-10      |
| EV-B    | E33  | AY302556         | Toluca-3   |
| EV-B    | EV69 | AY302560         | Toluca-1   |
| EV-B    | EV73 | AF241359         | CA55-1988  |

---

---

| Species | Type  | Accession number | Stain          |
|---------|-------|------------------|----------------|
| EV-B    | EV74  | AY556057         | USA-CA75-10213 |
| EV-B    | EV75  | AY556070         | USA-OK85-10362 |
| EV-B    | EV77  | AJ493062         | CF496-99       |
| EV-B    | EV79  | AY843297         | USA-CA79-10384 |
| EV-B    | EV80  | AY843298         | USA-CA67-10387 |
| EV-B    | EV81  | AY843299         | USA-CA68-10389 |
| EV-B    | EV82  | AY843300         | USA-CA64-10390 |
| EV-B    | EV83  | AY843301         | USA-CA76-10392 |
| EV-B    | EV84  | DQ902712         | CIV2003-10603  |
| EV-B    | EV85  | AY843303         | BAN00-10353    |
| EV-B    | EV86  | AY843304         | BAN00-10354    |
| EV-B    | EV87  | AY843305         | BAN01-10396    |
| EV-B    | EV88  | AY843306         | BAN01-10398    |
| EV-B    | EV97  | AY843307         | BAN99-10355    |
| EV-B    | EV98  | AB426608         | T92-1499       |
| EV-B    | EV100 | DQ902713         | BAN2000-10500  |
| EV-B    | EV101 | AY843308         | CIV03-10361    |
| EV-B    | EV107 | AB426609         | TN94-0349      |
| EV-C    | CA1   | AF499635         | Tompkins       |
| EV-C    | CA11  | AF499636         | Belgium-1      |
| EV-C    | CA13  | AF499637         | Flores         |
| EV-C    | CA17  | AF499639         | strain G12     |
| EV-C    | CA19  | AF499641         | 8663           |
| EV-C    | CA20  | AF499642         | IH35           |
| EV-C    | CA21  | AF546702         | Kuykendall     |
| EV-C    | CA22  | AF499643         | Chulman        |
| EV-C    | CA24  | D90457           | Joseph         |
| EV-C    | EV96  | EF015886         | BAN00-10488    |

---

---

| Species | Type  | Accession number | Stain           |
|---------|-------|------------------|-----------------|
| EV-C    | EV99  | EF555644         | USA-GA84-10636  |
| EV-C    | EV102 | EF555645         | 10424-BAN99     |
| EV-C    | EV104 | EU840733         | CL-1231094 FL   |
| EV-C    | EV105 | JX514943         | 34S/DRC/2010    |
| EV-C    | EV109 | GQ865517         | NICA08-4327     |
| EV-C    | EV113 | KC344833         | BBD-48          |
| EV-C    | EV116 | JX514942         | 126/Russia/2010 |
| EV-C    | EV117 | JX262382         | LIT22           |
| EV-C    | EV118 | JX961708         | ISR/38          |
| EV-D    | EV68  | AY426531         | Fermon          |
| EV-D    | EV70  | D00820           | J670/71         |
| EV-D    | EV94  | DQ916376         | E210            |

---
